# Supplementary material
Source: MDPI journal article supplement (https://www.mdpi.com/2071-1050/12/14/5702)
Supplement: s1 [file s1]

## Sheet: Final Selection
Bibliography Enironmental Change, Food securitz and Violent Conflict as drivers of migration
1)	UN Refugee Agency (UNHCR). Global Trends - Forced Displacement in 2018; 2019.
-2	IOM. World Migration Report 2020; 2019; Vol. 70. https://doi.org/10.1016/S0304-4017(96)01152-1.
-3	Mercandalli, S.; Losch, B. Rural Africa in Motion. Dynamics and Drivers of Migration South of the Sahara; FAO, 2017.
-4	European Commission. 1 St Meeting of the EUROPEAN MIGRATION FORUM Safe Routes, Safe Futures. How to Manage the Mixed Flows of Migrants across the Mediterranean?; 2015.
-5	Morales, H. C. The Role of Sustainable Energy Access in the Migration Debate; Eschborn, 2017.
-6	Crawley, H.; Düvell, F.; Jones, K.; Mcmahon, S.; Sigona, N.; Crawley, H.; Düvell, F.; Jones, K.; Mcmahon, S.; And Sigona, N. Destination Europe? Understanding the Dynamics and Drivers of Mediterranean Migration in 2015.
-7	Castles, S. International Migration at a Crossroads. Citizensh. Stud. 2014. https://doi.org/10.1080/13621025.2014.886439.
-8	Massey, D. S.; Arango, J.; Hugo, G.; Kouaouci, A.; Pellegrino, A.; Taylor, J. E. Theories of International Migration: A Review and Appraisal. Popul. Dev. Rev. 1993. https://doi.org/10.2307/2938462.
-9	Favell, A. The New Face of East-West Migration in Europe. Journal of Ethnic and Migration Studies. 2008. https://doi.org/10.1080/13691830802105947.
-10	Brettell, C.; Hollifield, J. Migration Theory: Talking across Disciplines. Migr. Theory Talk. Across Discip. 2015, 1–26. https://doi.org/10.1017/CBO9781107415324.004.
-11	Castles, S. Understanding Global Migration: A Social Transformation Perspective. J. Ethn. Migr. Stud. 2010. https://doi.org/10.1080/1369183X.2010.489381.
-12	Reuter, J.; Mecheril, P. Schlüsselwerke Der Migrationsforschung: Pionierstudien Und Referenztheorien; Springer-Verlag, 2015.
-13	Meyers, E. Theories of International Immigration Policy—A Comparative Analysis. Int. Migr. Rev. 2000, 34 (4), 1245–1282.
-14	Todaro, M. P. Stephen C. Smith. Econ. Dev. 2006, 10.
-15	Lee, E. S. A Theory of Migration. Demography 1966. https://doi.org/10.2307/2060063.
-16	Harris, J. R.; Todaro, M. P. Migration, Unemployment and Development: A Two-Sector Analysis. Am. Econ. Rev. 1970.
-17	Ortega, F.; Peri, G. The Effect of Income and Immigration Policies on International Migration. Migr. Stud. 2013, 1 (1), 47–74. https://doi.org/10.1093/migration/mns004.
-18	Garcia, A. J.; Pindolia, D. K.; Lopiano, K. K.; Tatem, A. J. Modeling Internal Migration Flows in Sub-Saharan Africa Using Census Microdata. Migr. Stud. 2014, 3 (1), 89–110. https://doi.org/10.1093/migration/mnu036.
-19	Termote, M. The Explanatory Power of Migration Models. In The Explanatory Power of Models; Springer, 2002; pp 165–179.
-20	Mavroudi, E.; Nagel, C. Global Migration: Patterns, Processes, and Politics; Routledge, 2016.
-21	Morawska, E. International Migration: Its Various Mechanisms and Different Theories That Try to Explain It. Willy Brand. Work. Pap. 2007.
-22	De Haas, H. Migration and Development: A Theoretical Perspective. Int. Migr. Rev. 2010. https://doi.org/10.1111/j.1747-7379.2009.00804.x.
-23	de Haas, H. The Internal Dynamics of Migration Processes: A Theoretical Inquiry. J. Ethn. Migr. Stud. 2010. https://doi.org/10.1080/1369183X.2010.489361.
-24	Carling, J.; Collins, F. Aspiration, Desire and Drivers of Migration. J. Ethn. Migr. Stud. 2018, 44 (6), 909–926. https://doi.org/10.1080/1369183X.2017.1384134.
-25	Gasper, D.; Gasper, D. The Ethics of Economic Development and Human Displacement. In The Oxford Handbook of Professional Economic Ethics; 2016. https://doi.org/10.1093/oxfordhb/9780199766635.013.023.
-26	FAO; IFAD; IOM; WFP. The Linkages Between Migration, Agriculture, Food Security and Rural Development; 2018.
-27	Bayar, M.; Aral, M. M. An Analysis of Large-Scale Forced Migration in Africa. Int. J. Environ. Res. Public Health 2019, 16 (21), 4210. https://doi.org/10.3390/ijerph16214210.
-28	Visvizi, A.; Lytras, M. D.; Pachocka, M. Multiple Facets of Migration Research: Key Questions, Topics, and Avenues yet to Be Explored. Sustainability (Switzerland). MDPI AG January 1, 2020, p 225. https://doi.org/10.3390/SU12010225.
-29	Van Hear, N.; Bakewell, O.; Long, K. Push-Pull plus: Reconsidering the Drivers of Migration. J. Ethn. Migr. Stud. 2018, 44 (6), 927–944. https://doi.org/10.1080/1369183X.2017.1384135.
-30	Theisen, O. M. Climate Change and Violence: Insights from Political Science. Curr. Clim. Chang. Reports 2017, 3 (4), 210–221. https://doi.org/10.1007/s40641-017-0079-5.
-31	Process Tracing; Bennett, A., Checkel, J. T., Eds.; Cambridge University Press: Cambridge, 2014. https://doi.org/10.1017/CBO9781139858472.
-32	Bloemraad, I. The Promise and Pitfalls of Comparative Research Design in the Study of Migration. Migr. Stud. 2013, 1 (1), 27–46. https://doi.org/10.1093/migration/mns035.
-33	Haaß, F.; Kurtenbach, S.; Strasheim, J. Fleeing the Peace? Determinants of Outward Migration after Civil War; 2016.
-34	Segovia, A. The Relationships between Food Security and Violent Conflicts: The Case of Colombia. 2017.
-35	IPCC. The IPCC’s Fifth Assessment Report: What’s in It for South Asia? Intergov. Panel Clim. Chang. 2014, 79. https://doi.org/http://cdkn.org/wp-content/uploads/2014/04/J1731_CDKN_FifthAssesmentReport_WEB.pdf.
-36	South, A.; Jolliffe, K. Forced Migration: Typology and Local Agency in Southeast Myanmar. Source Contemp. Southeast Asia 2015, 37 (2), 211–241. https://doi.org/10.1355/cs37-2c.
-37	Raleigh, C.; Jordan, L.; Salehyan, I. Assessing the Impact of Climate Change on Migration and Conflict. In paper commissioned by the World Bank Group for the Social Dimensions of Climate Change workshop, Washington, DC; 2008; pp 5–6.
-38	Liwenga, E. T.; Kwezi, L.; Afifi, T. “Where the Rain Falls” Project. Case Study:Tanzania. Results from Same District, Kilimanjaro Region. Report No. 6; Bonn, Germany, 2012.
-39	Ocello, C.; Petrucci, A.; Maria, •; Testa, R.; Vignoli, D.; Ocello, C.; Petrucci, A.; Vignoli, Á. D. Environmental Aspects of Internal Migration in Tanzania. Popul. Environ. 2015, 37, 99–108. https://doi.org/10.1007/s11111-014-0229-9.
-40	Melander, E. Organized Violence in the World 2015. An Assessment by the Uppsala Conflict Data Progam; 2015.
-41	UNHCR. Global Trends Forced Displacements 2017 Trends at a Glance. 2017, 1–76.
-42	United Nations. International Migration 2019 Report; 2019. https://doi.org/10.18356/c36d3e0d-en.
-43	Internal Displacement Monitoring Centre. Global Report on Internal Displacement 2017; 2017.
-44	IMDC. Global Overview 2015 People Internally Displaced by Conflict and Violence; 2015.
-45	Scott, S. V. Implications of Climate Change for the UN Security Council: Mapping the Range of Potential Policy Responses. Int. Aff. 2015, 91 (5), 1317–1333. https://doi.org/10.1073/pnas.1120177109.
-46	Raleigh, C. The Search for Safety: The Effects of Conflict, Poverty and Ecological Influences on Migration in the Developing World. Glob. Environ. Chang. 2011, 21, S82–S93. https://doi.org/10.1016/J.GLOENVCHA.2011.08.008.
-47	Neumann, K.; Sietz, D.; Hilderink, H.; Janssen, P.; Kok, M.; van Dijk, H. Environmental Drivers of Human Migration in Drylands – A Spatial Picture. Appl. Geogr. 2015, 56, 116–126. https://doi.org/10.1016/J.APGEOG.2014.11.021.
-48	McLeman, R.; Faist, T.; Schade, J. Introduction: Environment, Migration, and Inequality—A Complex Dynamic; Springer, Cham, 2016; pp 3–23. https://doi.org/10.1007/978-3-319-25796-9_1.
-49	IPCC. IPCC Climate Change 2013: The Physical Science Basis; 2013.
-50	Nielsen, J. Ø.; Reenberg, A. Temporality and the Problem with Singling out Climate as a Current Driver of Change in a Small West African Village. J. Arid Environ. 2010, 74 (4), 464–474.
-51	Kniveton, D.; Schmidt-Verkerk, K.; Smith, C.; Black, R. Climate Change and Migration. 2008.
-52	McLeman, R.; Smit, B. Migration as an Adaptation to Climate Change. Clim. Change 2006, 76 (1–2), 31–53.
-53	Wood, W. Ecomigration: Linkeages between Environmental Change and Migration In: A. Zolberg and P. Benda (Eds.): Global Migrants, Global Refugees: Problems and Solutions. New York: Berghahn Books 2001.
-54	IPCC, I. P. O. C. C. The IPCCS Fifth Assessment Report; What’s in It for Africa. Change 2014, 446 (November), 12–17. https://doi.org/10.1256/004316502320517344.
-55	Tierney, J. E.; Ummenhofer, C. C.; De Menocal, P. B. Past and Future Rainfall in the Horn of Africa. Sci Adv 1: E1500682. 2015.
-56	UNOCHA. Overview of El Niño Response in East and Southern Africa; 2016.
-57	Rabbani, G.; Shafeeqa, F.; Sharma, S. Assessing the Climate Change Environmental Degradation and Migration Nexus in South Asia. Dhaka IOM 2017.
-58	Guo, S.; Liu, G.; Zhang, Q.; Zhao, F.; Ding, G. Improvement in the Poverty Status of Ecological Migrants under the Urban Resettlement Model: An Empirical Study in China. Sustainability 2020, 12 (5), 2084. https://doi.org/10.3390/su12052084.
-59	Neumann, K.; Sietz, D.; Hilderink, H.; Janssen, P.; Kok, M.; van Dijk, H. Environmental Drivers of Human Migration in Drylands – A Spatial Picture. Appl. Geogr. 2015, 56, 116–126. https://doi.org/10.1016/J.APGEOG.2014.11.021.
-60	McLeman, R.; Faist, T.; Schade, J. Introduction: Environment, Migration, and Inequality—A Complex Dynamic; Springer, Cham, 2016; pp 3–23. https://doi.org/10.1007/978-3-319-25796-9_1.
-61	IPCC. IPCC Climate Change 2013: The Physical Science Basis; 2013.
-62	Nielsen, J. Ø.; Reenberg, A. Temporality and the Problem with Singling out Climate as a Current Driver of Change in a Small West African Village. J. Arid Environ. 2010, 74 (4), 464–474.
-63	Kniveton, D.; Schmidt-Verkerk, K.; Smith, C.; Black, R. Climate Change and Migration. 2008.
-64	FAO. Changing Policy Concepts of Food Security; 2006. https://doi.org/10.1517/17425247.2013.752354.
-65	Crush, J. Linking Food Security, Migration and Development. Int. Migr. 2013, 51 (5), 61–75. https://doi.org/10.1111/imig.12097.
-66	Vargas-Lundius, R.; Lanly, G.; Villarreal, M.; Osorio, M. International Migration, Remittances and Rural Development. 2008.
-67	Zezza, A.; Carletto, C.; Davis, B.; Winters, P. Assessing the Impact of Migration on Food and Nutrition Security. Food Policy 2011, 36 (1), 1–6.
-68	World Food Programme. AT THE ROOT OF EXODUS: Food Security, Conflict and International Migration; 2017.
-69	FAO & IOM. Agriculture and Migration in the Context of Climate Change; 2017.
-70	FAO; IFPRI. Conflict, Migration and Food Security: The Role of Agriculture and Rural Development; 2017.
-71	Buhaug, H. Climate-Conflict Research: Some Reflections on the Way Forward. Wiley Interdiscip. Rev. Clim. Chang. 2015, 6 (3), 269–275. https://doi.org/10.1002/wcc.336.
-72	Ghimire, R.; Ferreira, S.; Dorfman, J. H. Flood-Induced Displacement and Civil Conflict. World Dev. 2015, 66, 614–628. https://doi.org/10.1016/j.worlddev.2014.09.021.
-73	Babu, S. C.; Hassan, R. International Migration and Environmental Degradation—The Case of Mozambican Refugees and Forest Resources in Malawi. J. Environ. Manage. 1995, 43 (3), 233–247. https://doi.org/10.1016/S0301-4797(95)90414-X.
-74	Raleigh, C.; Choi, H. J.; Kniveton, D. The Devil Is in the Details: An Investigation of the Relationships between Conflict, Food Price and Climate across Africa. Glob. Environ. Chang. 2015, 32, 187–199. https://doi.org/10.1016/J.GLOENVCHA.2015.03.005.
-75	Hendrix, C. S.; Salehyan, I. Climate Change, Rainfall, and Social Conflict in Africa. J. Peace Res. 2012, 49 (1), 35–50.
-76	Theisen, O. M. Climate Clashes? Weather Variability, Land Pressure, and Organized Violence in Kenya, 1989–2004. J. Peace Res. 2012, 49 (1), 81–96.
-77	Witsenburg, K.; Roba, A. W. The Use and Management of Water Sources in Kenya’s Drylands: Is There a Link between Scarcity & Violent Conflicts? 2007.
-78	Shi, G.; LYU, Q.; Shangguan, Z.; Jiang, T. Facing Climate Change: What Drives Internal Migration Decisions in the Karst Rocky Regions of Southwest China. Sustainability 2019, 11 (7), 2142. https://doi.org/10.3390/su11072142.
-79	Bhavnani, R. R.; Lacina, B. The Effects of Weather-Induced Migration on Sons of the Soil Riots in India. World Polit. 2015, 67 (4), 760–794. https://doi.org/10.1017/S0043887115000222.
-80	Přívara, A.; Přívarová, M. Nexus between Climate Change, Displacement and Conflict: Afghanistan Case. Sustainability 2019, 11 (20), 5586. https://doi.org/10.3390/su11205586.
-81	Adger, W. N.; Pulhin, J. M.; Barnett, J.; Dabelko, G. D.; Hovelsrud, G. K.; Levy, M.; Oswald Spring, U.; Vogel, C. H. Human Security; Cambridge University Press, 2014.
-82	Neumann, K.; Sietz, D.; Hilderink, H.; Janssen, P.; Kok, M.; van Dijk, H. Environmental Drivers of Human Migration in Drylands–A Spatial Picture. Appl. Geogr. 2015, 56, 116–126.
-83	Rigaud, K. K.; de Sherbinin, A.; Jones, B.; Bergmann, J.; Clement, V.; Ober, K.; Schewe, J.; Adamo, S.; McCusker, B.; Heuser, S. Groundswell. 2018.
-84	Warner, K.; Afifi, T. Where the Rain Falls: Evidence from 8 Countries on How Vulnerable Households Use Migration to Manage the Risk of Rainfall Variability and Food Insecurity. Clim. Dev. 2014, 6 (1), 1–17. https://doi.org/10.1080/17565529.2013.835707.
-85	Ng’ang’a, S. K.; Bulte, E. H.; Giller, K. E.; McIntire, J. M.; Rufino, M. C. Migration and Self-Protection Against Climate Change: A Case Study of Samburu County, Kenya. World Dev. 2016, 84, 55–68. https://doi.org/10.1016/J.WORLDDEV.2016.04.002.
-86	Radel, C.; Schmook, B.; Carte, L.; Mardero, S. Toward a Political Ecology of Migration: Land, Labor Migration, and Climate Change in Northwestern Nicaragua. World Dev. 2018, 108, 263–273. https://doi.org/10.1016/J.WORLDDEV.2017.04.023.
-87	Rowhani, P.; Degomme, O.; Guha-Sapir, D.; Lambin, E. F. Malnutrition and Conflict in East Africa: The Impacts of Resource Variability on Human Security. Clim. Change 2011, 105 (1–2), 207–222. https://doi.org/10.1007/s10584-010-9884-8.
-88	World Food Programme. Hunger Without Borders 3; 2015.
-89	Fao. The Relationships between Food Security and Violent Conflicts: The Case of Colombia. 2017.
-90	Davenport, C.; Moore, W.; Poe, S. Sometimes You Just Have to Leave: Domestic Threats and Forced Migration, 1964-1989. Int. Interact. 2003, 29 (1), 27–55.
-91	Moore, W. H.; Shellman, S. M. Refugee or Internally Displaced Person? To Where Should One Flee? Comp. Polit. Stud. 2006, 39 (5), 599–622.
-92	Leal Buitrago, F. Una Visión de La Seguridad En Colombia; Instituto de Estudios Políticos y Relaciones Internacionales (IEPRI), Universidad Nacional de Colombia, 2011; Vol. 73. https://doi.org/10.1002/adma.200390078.
-93	Steele, A. Electing Displacement: Political Cleansing in Apartadó, Colombia. J. Conflict Resolut. 2011, 55 (3), 423–445. https://doi.org/10.1177/0022002711400975.
-94	Cely, D. M. F. Grupo de Memoria Histórica,¡ Basta Ya! Colombia: Memorias de Guerra y Dignidad (Bogotá: Imprenta Nacional, 2013), 431 Pp. 1. Hist. y Soc. 2014, No. 26, 274–281.
-95	Defensoria del Pueblo de Colombia. Al menos 555 líderes sociales han sido asesinados entre 2016 y 2019: Defensoría del Pueblo | Defensoría del Pueblo https://www.defensoria.gov.co/es/nube/enlosmedios/8996/Al-menos-555-líderes-sociales-han-sido-asesinados-entre-2016-y-2019-Defensoría-del-Pueblo.htm (accessed Jun 9, 2020).
-96	Defensoría del Pueblo, C. Entregarán información para defender líderes sociales | Defensoría del Pueblo https://www.defensoria.gov.co/es/nube/enlosmedios/7874/Entregarán-información-para-defender-líderes-sociales.htm (accessed Jun 9, 2020).
-97	CNMH. Una Nación Desplazada: Informe Nacional Del Desplazamiento Forzado En Colombia :: Centro Nacional de Memoria Histórica; 2015.
-98	Cornelius, W. A.; Rosenblum, M. R. IMMIGRATION AND POLITICS. Annu. Rev. Polit. Sci. 2005, 8 (1), 99–119. https://doi.org/10.1146/annurev.polisci.8.082103.104854.
-99	Haaß, F.; Kurtenbach, S.; Strasheim, J. Fleeing the Peace? Determinants of Outward Migration after Civil War. GIGA Work. Pap. 2016, 289.
-100	World Food Programme (WFP); Instituto Colombiano de Bienestar Familiar (ICBF). Mapas de La Situación Nutricional En Colombia; Bogotá, 2008.
-101	World Food Programme. La Vulnerabilidad Alimentaria de Hogares Desplazados y No Desplazados: Un Estudio de Caso En Ocho Departamentos de Colombia; 2006.
-102	USAID. Colombia | U.S. Agency for International Development https://www.usaid.gov/colombia/our-work (accessed Jun 9, 2020).
-103	Echandía, C. Expansión Territorial de Las Guerrillas Colombianas: Geografía, Economía y Violencia. Reconocer la Guerr. para construir la paz 1999, 400 (01), 99–149.
-104	Echandía Castilla, C. El Conflicto Armado Colombiano En Los Años Noventa: Cambios En Las Estrategias y Efectos Económicos. Colomb. Int. 2000. https://doi.org/10.7440/colombiaint49-50.2000.06.
-105	Valenzuela, P.; Colombia, S. C. S. E.-E. peacebuilding in post-conflict. Environmental Peacebuilding in Post-Conflict Colombia. In Routledge Handbook of Environmental Conflict and Peacebuilding; Routledge, 2018. https://doi.org/10.4324/9781315473772-17.
-106	Graser, M.; Bonatti, M.; Eufemia, L.; Morales, H.; Lana, M.; Löhr, K.; Sieber, S. Peacebuilding in Rural Colombia—A Collective Perception of the Integrated Rural Reform (IRR) in the Department of Caquetá (Amazon). Land 2020, 9 (2), 36. https://doi.org/10.3390/land9020036.
-107	Hein, J.; Del Cairo, C.; Gallego, D. O.; Gutiérrez, T. V.; Velez, J. S.; de Francisco, J. C. R. A Political Ecology of Green Territorialization: Frontier Expansion and Conservation in the Colombian Amazon. DIE ERDE–Journal Geogr. Soc. Berlin 2020, 151 (1), 37–57.
-108	Eufemia, L.; Bonatti, M.; Castro-Nunez, A.; Lana, M.; Morales, H.; Sieber, S. Colombia’s Inadequate Environmental Goals. Science. American Association for the Advancement of Science May 3, 2019, pp 444–445. https://doi.org/10.1126/science.aax3494.
-109	Castro-Nunez, A.; Mertz, O.; Quintero, M. Propensity of Farmers to Conserve Forest within REDD+ Projects in Areas Affected by Armed-Conflict. For. Policy Econ. 2016, 66, 22–30. https://doi.org/10.1016/j.forpol.2016.02.005.
-110	Reeder, G. Urban Governance of Flooding in Myanmar: A Case Study of Bago; Springer, Cham, 2019; pp 103–126. https://doi.org/10.1007/978-3-319-98968-6_6.
-111	Parmar, P. K.; Barina, C.; Low, S.; Tun, K. T.; Otterness, C.; Mhote, P. P.; Htoo, S. N.; Kyaw, S. W.; Lwin, N. A.; Maung, C.; Moo, N. M.; Oo, E. K. S.; Reh, D.; Mon, N. C.; Zhou, X.; Richards, A. K. Migration Patterns & Their Associations with Health and Human Rights in Eastern Myanmar after Political Transition: Results of a Population-Based Survey Using Multistaged Household Cluster Sampling. …
-112	World Bank. Domestic Migration in Two Regions of Myanmar.
-113	Global Facility for Disaster Reduction and Recovery. Myanmar https://www.gfdrr.org/en/myanmar (accessed Jun 9, 2020).
-114	Poussard, W.; Hayter, J. Myanmar. In Community Resilience in Natural Disasters; 2011; pp 141–167. https://doi.org/10.1057/9780230339323.
-115	Connell, J. Statelessness and Environmental Displacement. Forced Migr. Rev. 2015, No. 49, 46.
-116	Mallick, B. The Nexus between Socio-Ecological System, Livelihood Resilience, and Migration Decisions: Empirical Evidence from Bangladesh. Sustainability 2019, 11 (12), 3332. https://doi.org/10.3390/su11123332.
-117	Grundy‐Warr, C. Myanmar/Burma, Migration 1962 to Present. Encycl. Glob. Hum. Migr. 2013.
-118	Cheesman, N.; Farrelly, N. Conflict in Myanmar: War, Politics, Religion; ISEAS-Yusof Ishak Institute, 2016.
-119	Callahan, M. P. Making Enemies: War and State Building in Myanmar. Singapore: NUS Press 2004.
-120	TNI, T. I. Re-Asserting Control: Voluntary Return, Restitution and the Right to Land for IDPs and Refugees in Myanmar; 2017.
-121	Bylander, M. Poor and on the Move: South–South Migration and Poverty in Cambodia. Migr. Stud. 2017, 5 (2), 237–266. https://doi.org/10.1093/migration/mnx026.
-122	United Nations. Rohingya Refugee Crisis Timeline https://news.un.org/en/focus/rohingya-refugee-crisis (accessed Jun 4, 2020).
-123	Heinrich Böll Foundation. Perspectives Asia #3: A Continent on the Move. Asian Migration https://th.boell.org/en/2015/01/16/perspectives-asia-3-continent-move-asian-migration (accessed Jun 9, 2020).
-124	Ball, J.; Moselle, S. Forced Migrant Youth’s Identity Development and Agency in Resettlement Decision-Making: Liminal Life on the Myanmar-Thailand Border. 2016.
-125	Rosenthal, G. A BRIEF AND INDEPENDENT INQUIRY INTO THE INVOLVEMENT OF THE UNITED NATIONS IN MYANMAR FROM 2010 TO 2018; 2019.
-126	Afifi, T.; Liwenga, E.; Kwezi, L. Rainfall-Induced Crop Failure, Food Insecurity and out-Migration in Same-Kilimanjaro, Tanzania. Clim. Dev. 2014, 6 (1), 53–60.
-127	Paavola, J. Livelihoods, Vulnerability and Adaptation to Climate Change in Morogoro, Tanzania. Environ. Sci. Policy 2008, 11 (7), 642–654. https://doi.org/10.1016/J.ENVSCI.2008.06.002.
-128	Conservation, B. D. and W.; Tanzania, S. of. Conserving Biodiversity in the Uluguru Mountains, Tanzania.
-129	Paul, B. K. Evidence against Disaster‐induced Migration: The 2004 Tornado in North‐central Bangladesh. Disasters 2005, 29 (4), 370–385.
-130	Buhaug, H.; Benjaminsen, T. A.; Sjaastad, E.; Magnus Theisen, O. Climate Variability, Food Production Shocks, and Violent Conflict in Sub-Saharan Africa. Environ. Res. Lett. 2015, 10 (12), 125015. https://doi.org/10.1088/1748-9326/10/12/125015.
-131	da Silva, José Graziano; and Fan, S. Conflict, Migration and Food Security: The Role of Agriculture and Rural Development.
-132	Huang, H.; von Lampe, M.; van Tongeren, F. Climate Change and Trade in Agriculture. Food Policy 2011, 36, S9–S13. https://doi.org/10.1016/J.FOODPOL.2010.10.008.
-133	UN News. Top UN Court Orders Myanmar to Protect Rohingya from Genocide. 2020. https://doi.org/10.1016/j.precon.2005.06.007.
-134	Tacoli, C. Crisis or Adaptation? Migration and Climate Change in a Context of High Mobility. Environ. Urban. 2009, 21 (2), 513–525.
-135	Wallace, D.; Silander, D. Climate Change, Policy and Security: State and Human Impacts; Routledge, 2018. https://doi.org/10.4324/9781351060479.
-136	United Nations; Assembly, G. New York Declaration for Refugees and Migrants. Int. J. Refug. Law 2019, 30 (4), 715–743. https://doi.org/10.1093/ijrl/eez018.
-137	Özerdem, A.; Mac Ginty, R. Comparing Peace Processes.
-138	Skeldon, R. Interlinkages between Internal and International Migration and Development in the Asian Region. Popul. Space Place 2006, 12 (1), 15–30.
-139	Skeldon, R. On Migration and the Policy Process. In Migration, Development and Environment: Migration Processes from the Perspective of Environmental Change and Development Approach at the Beginning of the 21st Century; Cambridge Scholars Publishing in association with GSE Research, 2008; Vol. 154, pp 154–172.

## Sheet: Environment-violent conflict-fo
environment, conflict food security
-46	Raleigh, C. The Search for Safety: The Effects of Conflict, Poverty and Ecological Influences on Migration in the Developing World. Glob. Environ. Chang. 2011, 21, S82–S93. https://doi.org/10.1016/J.GLOENVCHA.2011.08.008.
-71	Buhaug, H. Climate-Conflict Research: Some Reflections on the Way Forward. Wiley Interdiscip. Rev. Clim. Chang. 2015, 6 (3), 269–275. https://doi.org/10.1002/wcc.336.
-70	FAO; IFPRI. Conflict, Migration and Food Security: The Role of Agriculture and Rural Development; 2017.
-74	Raleigh, C.; Choi, H. J.; Kniveton, D. The Devil Is in the Details: An Investigation of the Relationships between Conflict, Food Price and Climate across Africa. Glob. Environ. Chang. 2015, 32, 187–199. https://doi.org/10.1016/J.GLOENVCHA.2015.03.005.
-130	Buhaug, H.; Benjaminsen, T. A.; Sjaastad, E.; Magnus Theisen, O. Climate Variability, Food Production Shocks, and Violent Conflict in Sub-Saharan Africa. Environ. Res. Lett. 2015, 10 (12), 125015. https://doi.org/10.1088/1748-9326/10/12/125015.

## Sheet: Environment - Conflict
	Environment Conflict
1	-37	Raleigh, C.; Jordan, L.; Salehyan, I. Assessing the Impact of Climate Change on Migration and Conflict. In paper commissioned by the World Bank Group for the Social Dimensions of Climate Change workshop, Washington, DC; 2008; pp 5–6.
2	-45	Scott, S. V. Implications of Climate Change for the UN Security Council: Mapping the Range of Potential Policy Responses. Int. Aff. 2015, 91 (5), 1317–1333. https://doi.org/10.1073/pnas.1120177109.
3	-72	Ghimire, R.; Ferreira, S.; Dorfman, J. H. Flood-Induced Displacement and Civil Conflict. World Dev. 2015, 66, 614–628. https://doi.org/10.1016/j.worlddev.2014.09.021.
4	-73	Babu, S. C.; Hassan, R. International Migration and Environmental Degradation—The Case of Mozambican Refugees and Forest Resources in Malawi. J. Environ. Manage. 1995, 43 (3), 233–247. https://doi.org/10.1016/S0301-4797(95)90414-X.
5	-75	Hendrix, C. S.; Salehyan, I. Climate Change, Rainfall, and Social Conflict in Africa. J. Peace Res. 2012, 49 (1), 35–50.
6	-76	Theisen, O. M. Climate Clashes? Weather Variability, Land Pressure, and Organized Violence in Kenya, 1989–2004. J. Peace Res. 2012, 49 (1), 81–96.
7	-77	Witsenburg, K.; Roba, A. W. The Use and Management of Water Sources in Kenya’s Drylands: Is There a Link between Scarcity & Violent Conflicts? 2007.
8	-79	Bhavnani, R. R.; Lacina, B. The Effects of Weather-Induced Migration on Sons of the Soil Riots in India. World Polit. 2015, 67 (4), 760–794. https://doi.org/10.1017/S0043887115000222.
9	-80	Přívara, A.; Přívarová, M. Nexus between Climate Change, Displacement and Conflict: Afghanistan Case. Sustainability 2019, 11 (20), 5586. https://doi.org/10.3390/su11205586.
10	-81	Adger, W. N.; Pulhin, J. M.; Barnett, J.; Dabelko, G. D.; Hovelsrud, G. K.; Levy, M.; Oswald Spring, U.; Vogel, C. H. Human Security; Cambridge University Press, 2014.
11	-105	Valenzuela, P.; Colombia, S. C. S. E.-E. peacebuilding in post-conflict. Environmental Peacebuilding in Post-Conflict Colombia. In Routledge Handbook of Environmental Conflict and Peacebuilding; Routledge, 2018. https://doi.org/10.4324/9781315473772-17.
12	-106	Graser, M.; Bonatti, M.; Eufemia, L.; Morales, H.; Lana, M.; Löhr, K.; Sieber, S. Peacebuilding in Rural Colombia—A Collective Perception of the Integrated Rural Reform (IRR) in the Department of Caquetá (Amazon). Land 2020, 9 (2), 36. https://doi.org/10.3390/land9020036.
13	-107	Hein, J.; Del Cairo, C.; Gallego, D. O.; Gutiérrez, T. V.; Velez, J. S.; de Francisco, J. C. R. A Political Ecology of Green Territorialization: Frontier Expansion and Conservation in the Colombian Amazon. DIE ERDE–Journal Geogr. Soc. Berlin 2020, 151 (1), 37–57.
14	-108	Eufemia, L.; Bonatti, M.; Castro-Nunez, A.; Lana, M.; Morales, H.; Sieber, S. Colombia’s Inadequate Environmental Goals. Science. American Association for the Advancement of Science May 3, 2019, pp 444–445. https://doi.org/10.1126/science.aax3494.
15	-109	Castro-Nunez, A.; Mertz, O.; Quintero, M. Propensity of Farmers to Conserve Forest within REDD+ Projects in Areas Affected by Armed-Conflict. For. Policy Econ. 2016, 66, 22–30. https://doi.org/10.1016/j.forpol.2016.02.005.
16	-112	World Bank. Domestic Migration in Two Regions of Myanmar.
17	-113	Global Facility for Disaster Reduction and Recovery. Myanmar https://www.gfdrr.org/en/myanmar (accessed Jun 9, 2020).
18	-120	TNI, T. I. Re-Asserting Control: Voluntary Return, Restitution and the Right to Land for IDPs and Refugees in Myanmar; 2017.
19	-123	Heinrich Böll Foundation. Perspectives Asia #3: A Continent on the Move. Asian Migration https://th.boell.org/en/2015/01/16/perspectives-asia-3-continent-move-asian-migration (accessed Jun 9, 2020).
20	-135	Wallace, D.; Silander, D. Climate Change, Policy and Security: State and Human Impacts; Routledge, 2018. https://doi.org/10.4324/9781351060479.

## Sheet: Environment Food security
	Environment food security
1	-38	Liwenga, E. T.; Kwezi, L.; Afifi, T. “Where the Rain Falls” Project. Case Study:Tanzania. Results from Same District, Kilimanjaro Region. Report No. 6; Bonn, Germany, 2012.
2	-84	Warner, K.; Afifi, T. Where the Rain Falls: Evidence from 8 Countries on How Vulnerable Households Use Migration to Manage the Risk of Rainfall Variability and Food Insecurity. Clim. Dev. 2014, 6 (1), 1–17. https://doi.org/10.1080/17565529.2013.835707.
3	-85	Ng’ang’a, S. K.; Bulte, E. H.; Giller, K. E.; McIntire, J. M.; Rufino, M. C. Migration and Self-Protection Against Climate Change: A Case Study of Samburu County, Kenya. World Dev. 2016, 84, 55–68. https://doi.org/10.1016/J.WORLDDEV.2016.04.002.
4	-86	Radel, C.; Schmook, B.; Carte, L.; Mardero, S. Toward a Political Ecology of Migration: Land, Labor Migration, and Climate Change in Northwestern Nicaragua. World Dev. 2018, 108, 263–273. https://doi.org/10.1016/J.WORLDDEV.2017.04.023.
5	-116	Mallick, B. The Nexus between Socio-Ecological System, Livelihood Resilience, and Migration Decisions: Empirical Evidence from Bangladesh. Sustainability 2019, 11 (12), 3332. https://doi.org/10.3390/su11123332.
6	-121	Bylander, M. Poor and on the Move: South–South Migration and Poverty in Cambodia. Migr. Stud. 2017, 5 (2), 237–266. https://doi.org/10.1093/migration/mnx026.
7	-126	Afifi, T.; Liwenga, E.; Kwezi, L. Rainfall-Induced Crop Failure, Food Insecurity and out-Migration in Same-Kilimanjaro, Tanzania. Clim. Dev. 2014, 6 (1), 53–60.
8	-127	Paavola, J. Livelihoods, Vulnerability and Adaptation to Climate Change in Morogoro, Tanzania. Environ. Sci. Policy 2008, 11 (7), 642–654. https://doi.org/10.1016/J.ENVSCI.2008.06.002.
9	-128	Conservation, B. D. and W.; Tanzania, S. of. Conserving Biodiversity in the Uluguru Mountains, Tanzania.
10	-132	Huang, H.; von Lampe, M.; van Tongeren, F. Climate Change and Trade in Agriculture. Food Policy 2011, 36, S9–S13. https://doi.org/10.1016/J.FOODPOL.2010.10.008.

## Sheet: Environment
	Environment
1	-35	IPCC. The IPCC’s Fifth Assessment Report: What’s in It for South Asia? Intergov. Panel Clim. Chang. 2014, 79. https://doi.org/http://cdkn.org/wp-content/uploads/2014/04/J1731_CDKN_FifthAssesmentReport_WEB.pdf.
2	-39	Ocello, C.; Petrucci, A.; Maria, •; Testa, R.; Vignoli, D.; Ocello, C.; Petrucci, A.; Vignoli, Á. D. Environmental Aspects of Internal Migration in Tanzania. Popul. Environ. 2015, 37, 99–108. https://doi.org/10.1007/s11111-014-0229-9.
3	-47	Neumann, K.; Sietz, D.; Hilderink, H.; Janssen, P.; Kok, M.; van Dijk, H. Environmental Drivers of Human Migration in Drylands – A Spatial Picture. Appl. Geogr. 2015, 56, 116–126. https://doi.org/10.1016/J.APGEOG.2014.11.021.
4	-48	McLeman, R.; Faist, T.; Schade, J. Introduction: Environment, Migration, and Inequality—A Complex Dynamic; Springer, Cham, 2016; pp 3–23. https://doi.org/10.1007/978-3-319-25796-9_1.
5	-49	IPCC. IPCC Climate Change 2013: The Physical Science Basis; 2013.
6	-50	Nielsen, J. Ø.; Reenberg, A. Temporality and the Problem with Singling out Climate as a Current Driver of Change in a Small West African Village. J. Arid Environ. 2010, 74 (4), 464–474.
7	-51	Kniveton, D.; Schmidt-Verkerk, K.; Smith, C.; Black, R. Climate Change and Migration. 2008.
8	-52	McLeman, R.; Smit, B. Migration as an Adaptation to Climate Change. Clim. Change 2006, 76 (1–2), 31–53.
9	-53	Wood, W. Ecomigration: Linkeages between Environmental Change and Migration In: A. Zolberg and P. Benda (Eds.): Global Migrants, Global Refugees: Problems and Solutions. New York: Berghahn Books 2001.
10	-54	IPCC, I. P. O. C. C. The IPCCS Fifth Assessment Report; What’s in It for Africa. Change 2014, 446 (November), 12–17. https://doi.org/10.1256/004316502320517344.
11	-55	Tierney, J. E.; Ummenhofer, C. C.; De Menocal, P. B. Past and Future Rainfall in the Horn of Africa. Sci Adv 1: E1500682. 2015.
12	-56	UNOCHA. Overview of El Niño Response in East and Southern Africa; 2016.
13	-57	Rabbani, G.; Shafeeqa, F.; Sharma, S. Assessing the Climate Change Environmental Degradation and Migration Nexus in South Asia. Dhaka IOM 2017.
14	-58	Guo, S.; Liu, G.; Zhang, Q.; Zhao, F.; Ding, G. Improvement in the Poverty Status of Ecological Migrants under the Urban Resettlement Model: An Empirical Study in China. Sustainability 2020, 12 (5), 2084. https://doi.org/10.3390/su12052084.
15	-59	Neumann, K.; Sietz, D.; Hilderink, H.; Janssen, P.; Kok, M.; van Dijk, H. Environmental Drivers of Human Migration in Drylands – A Spatial Picture. Appl. Geogr. 2015, 56, 116–126. https://doi.org/10.1016/J.APGEOG.2014.11.021.
16	-60	McLeman, R.; Faist, T.; Schade, J. Introduction: Environment, Migration, and Inequality—A Complex Dynamic; Springer, Cham, 2016; pp 3–23. https://doi.org/10.1007/978-3-319-25796-9_1.
17	-61	IPCC. IPCC Climate Change 2013: The Physical Science Basis; 2013.
18	-62	Nielsen, J. Ø.; Reenberg, A. Temporality and the Problem with Singling out Climate as a Current Driver of Change in a Small West African Village. J. Arid Environ. 2010, 74 (4), 464–474.
19	-63	Kniveton, D.; Schmidt-Verkerk, K.; Smith, C.; Black, R. Climate Change and Migration. 2008.
20	-78	Shi, G.; LYU, Q.; Shangguan, Z.; Jiang, T. Facing Climate Change: What Drives Internal Migration Decisions in the Karst Rocky Regions of Southwest China. Sustainability 2019, 11 (7), 2142. https://doi.org/10.3390/su11072142.
21	-82	Neumann, K.; Sietz, D.; Hilderink, H.; Janssen, P.; Kok, M.; van Dijk, H. Environmental Drivers of Human Migration in Drylands–A Spatial Picture. Appl. Geogr. 2015, 56, 116–126.
22	-83	Rigaud, K. K.; de Sherbinin, A.; Jones, B.; Bergmann, J.; Clement, V.; Ober, K.; Schewe, J.; Adamo, S.; McCusker, B.; Heuser, S. Groundswell. 2018.
23	-102	USAID. Colombia | U.S. Agency for International Development https://www.usaid.gov/colombia/our-work (accessed Jun 9, 2020).
24	-110	Reeder, G. Urban Governance of Flooding in Myanmar: A Case Study of Bago; Springer, Cham, 2019; pp 103–126. https://doi.org/10.1007/978-3-319-98968-6_6.
25	-114	Poussard, W.; Hayter, J. Myanmar. In Community Resilience in Natural Disasters; 2011; pp 141–167. https://doi.org/10.1057/9780230339323.
26	-115	Connell, J. Statelessness and Environmental Displacement. Forced Migr. Rev. 2015, No. 49, 46.
27	-129	Paul, B. K. Evidence against Disaster‐induced Migration: The 2004 Tornado in North‐central Bangladesh. Disasters 2005, 29 (4), 370–385.
28	-134	Tacoli, C. Crisis or Adaptation? Migration and Climate Change in a Context of High Mobility. Environ. Urban. 2009, 21 (2), 513–525.

## Sheet: Food security - conflict
	food security and conflict
1	-34	Segovia, A. The Relationships between Food Security and Violent Conflicts: The Case of Colombia. 2017.
2	-68	World Food Programme. AT THE ROOT OF EXODUS: Food Security, Conflict and International Migration; 2017.
3	-70	FAO; IFPRI. Conflict, Migration and Food Security: The Role of Agriculture and Rural Development; 2017.
4	-87	Rowhani, P.; Degomme, O.; Guha-Sapir, D.; Lambin, E. F. Malnutrition and Conflict in East Africa: The Impacts of Resource Variability on Human Security. Clim. Change 2011, 105 (1–2), 207–222. https://doi.org/10.1007/s10584-010-9884-8.
5	-88	World Food Programme. Hunger Without Borders 3; 2015.
6	-89	Fao. The Relationships between Food Security and Violent Conflicts: The Case of Colombia. 2017.
7	-131	da Silva, José Graziano; and Fan, S. Conflict, Migration and Food Security: The Role of Agriculture and Rural Development.

## Sheet: Conflict
	conflict
1	-33	Haaß, F.; Kurtenbach, S.; Strasheim, J. Fleeing the Peace? Determinants of Outward Migration after Civil War; 2016.
2	-36	South, A.; Jolliffe, K. Forced Migration: Typology and Local Agency in Southeast Myanmar. Source Contemp. Southeast Asia 2015, 37 (2), 211–241. https://doi.org/10.1355/cs37-2c.
3	-40	Melander, E. Organized Violence in the World 2015. An Assessment by the Uppsala Conflict Data Progam; 2015.
4	-44	IMDC. Global Overview 2015 People Internally Displaced by Conflict and Violence; 2015.
5	-90	Davenport, C.; Moore, W.; Poe, S. Sometimes You Just Have to Leave: Domestic Threats and Forced Migration, 1964-1989. Int. Interact. 2003, 29 (1), 27–55.
6	-91	Moore, W. H.; Shellman, S. M. Refugee or Internally Displaced Person? To Where Should One Flee? Comp. Polit. Stud. 2006, 39 (5), 599–622.
7	-92	Leal Buitrago, F. Una Visión de La Seguridad En Colombia; Instituto de Estudios Políticos y Relaciones Internacionales (IEPRI), Universidad Nacional de Colombia, 2011; Vol. 73. https://doi.org/10.1002/adma.200390078.
8	-93	Steele, A. Electing Displacement: Political Cleansing in Apartadó, Colombia. J. Conflict Resolut. 2011, 55 (3), 423–445. https://doi.org/10.1177/0022002711400975.
9	-94	Cely, D. M. F. Grupo de Memoria Histórica,¡ Basta Ya! Colombia: Memorias de Guerra y Dignidad (Bogotá: Imprenta Nacional, 2013), 431 Pp. 1. Hist. y Soc. 2014, No. 26, 274–281.
10	-95	Defensoria del Pueblo de Colombia. Al menos 555 líderes sociales han sido asesinados entre 2016 y 2019: Defensoría del Pueblo | Defensoría del Pueblo https://www.defensoria.gov.co/es/nube/enlosmedios/8996/Al-menos-555-líderes-sociales-han-sido-asesinados-entre-2016-y-2019-Defensoría-del-Pueblo.htm (accessed Jun 9, 2020).
11	-96	Defensoría del Pueblo, C. Entregarán información para defender líderes sociales | Defensoría del Pueblo https://www.defensoria.gov.co/es/nube/enlosmedios/7874/Entregarán-información-para-defender-líderes-sociales.htm (accessed Jun 9, 2020).
12	-97	CNMH. Una Nación Desplazada: Informe Nacional Del Desplazamiento Forzado En Colombia :: Centro Nacional de Memoria Histórica; 2015.
13	-98	Cornelius, W. A.; Rosenblum, M. R. IMMIGRATION AND POLITICS. Annu. Rev. Polit. Sci. 2005, 8 (1), 99–119. https://doi.org/10.1146/annurev.polisci.8.082103.104854.
14	-99	Haaß, F.; Kurtenbach, S.; Strasheim, J. Fleeing the Peace? Determinants of Outward Migration after Civil War. GIGA Work. Pap. 2016, 289.
15	-103	Echandía, C. Expansión Territorial de Las Guerrillas Colombianas: Geografía, Economía y Violencia. Reconocer la Guerr. para construir la paz 1999, 400 (01), 99–149.
16	-104	Echandía Castilla, C. El Conflicto Armado Colombiano En Los Años Noventa: Cambios En Las Estrategias y Efectos Económicos. Colomb. Int. 2000. https://doi.org/10.7440/colombiaint49-50.2000.06.
17	-111	Parmar, P. K.; Barina, C.; Low, S.; Tun, K. T.; Otterness, C.; Mhote, P. P.; Htoo, S. N.; Kyaw, S. W.; Lwin, N. A.; Maung, C.; Moo, N. M.; Oo, E. K. S.; Reh, D.; Mon, N. C.; Zhou, X.; Richards, A. K. Migration Patterns & Their Associations with Health and Human Rights in Eastern Myanmar after Political Transition: Results of a Population-Based Survey Using Multistaged Household Cluster Sampling. …
18	-117	Grundy‐Warr, C. Myanmar/Burma, Migration 1962 to Present. Encycl. Glob. Hum. Migr. 2013.
19	-118	Cheesman, N.; Farrelly, N. Conflict in Myanmar: War, Politics, Religion; ISEAS-Yusof Ishak Institute, 2016.
20	-119	Callahan, M. P. Making Enemies: War and State Building in Myanmar. Singapore: NUS Press 2004.
21	-122	United Nations. Rohingya Refugee Crisis Timeline https://news.un.org/en/focus/rohingya-refugee-crisis (accessed Jun 4, 2020).
22	-124	Ball, J.; Moselle, S. Forced Migrant Youth’s Identity Development and Agency in Resettlement Decision-Making: Liminal Life on the Myanmar-Thailand Border. 2016.
23	-125	Rosenthal, G. A BRIEF AND INDEPENDENT INQUIRY INTO THE INVOLVEMENT OF THE UNITED NATIONS IN MYANMAR FROM 2010 TO 2018; 2019.
24	-133	UN News. Top UN Court Orders Myanmar to Protect Rohingya from Genocide. 2020. https://doi.org/10.1016/j.precon.2005.06.007.
25	-137	Özerdem, A.; Mac Ginty, R. Comparing Peace Processes.

## Sheet: Food security
	Food security
1	-26	FAO; IFAD; IOM; WFP. The Linkages Between Migration, Agriculture, Food Security and Rural Development; 2018.
2	-64	FAO. Changing Policy Concepts of Food Security; 2006. https://doi.org/10.1517/17425247.2013.752354.
3	-65	Crush, J. Linking Food Security, Migration and Development. Int. Migr. 2013, 51 (5), 61–75. https://doi.org/10.1111/imig.12097.
4	-66	Vargas-Lundius, R.; Lanly, G.; Villarreal, M.; Osorio, M. International Migration, Remittances and Rural Development. 2008.
5	-67	Zezza, A.; Carletto, C.; Davis, B.; Winters, P. Assessing the Impact of Migration on Food and Nutrition Security. Food Policy 2011, 36 (1), 1–6.
6	-69	FAO & IOM. Agriculture and Migration in the Context of Climate Change; 2017.
7	-100	World Food Programme (WFP); Instituto Colombiano de Bienestar Familiar (ICBF). Mapas de La Situación Nutricional En Colombia; Bogotá, 2008.
8	-101	World Food Programme. La Vulnerabilidad Alimentaria de Hogares Desplazados y No Desplazados: Un Estudio de Caso En Ocho Departamentos de Colombia; 2006.

## Sheet: Migration research trends
	General Migration
1	1)	UN Refugee Agency (UNHCR). Global Trends - Forced Displacement in 2018; 2019.
2	-2	IOM. World Migration Report 2020; 2019; Vol. 70. https://doi.org/10.1016/S0304-4017(96)01152-1.
3	-3	Mercandalli, S.; Losch, B. Rural Africa in Motion. Dynamics and Drivers of Migration South of the Sahara; FAO, 2017.
4	-4	European Commission. 1 St Meeting of the EUROPEAN MIGRATION FORUM Safe Routes, Safe Futures. How to Manage the Mixed Flows of Migrants across the Mediterranean?; 2015.
5	-5	Morales, H. C. The Role of Sustainable Energy Access in the Migration Debate; Eschborn, 2017.
6	-6	Crawley, H.; Düvell, F.; Jones, K.; Mcmahon, S.; Sigona, N.; Crawley, H.; Düvell, F.; Jones, K.; Mcmahon, S.; And Sigona, N. Destination Europe? Understanding the Dynamics and Drivers of Mediterranean Migration in 2015.
7	-7	Castles, S. International Migration at a Crossroads. Citizensh. Stud. 2014. https://doi.org/10.1080/13621025.2014.886439.
8	-8	Massey, D. S.; Arango, J.; Hugo, G.; Kouaouci, A.; Pellegrino, A.; Taylor, J. E. Theories of International Migration: A Review and Appraisal. Popul. Dev. Rev. 1993. https://doi.org/10.2307/2938462.
9	-9	Favell, A. The New Face of East-West Migration in Europe. Journal of Ethnic and Migration Studies. 2008. https://doi.org/10.1080/13691830802105947.
10	-10	Brettell, C.; Hollifield, J. Migration Theory: Talking across Disciplines. Migr. Theory Talk. Across Discip. 2015, 1–26. https://doi.org/10.1017/CBO9781107415324.004.
11	-11	Castles, S. Understanding Global Migration: A Social Transformation Perspective. J. Ethn. Migr. Stud. 2010. https://doi.org/10.1080/1369183X.2010.489381.
12	-12	Reuter, J.; Mecheril, P. Schlüsselwerke Der Migrationsforschung: Pionierstudien Und Referenztheorien; Springer-Verlag, 2015.
13	-13	Meyers, E. Theories of International Immigration Policy—A Comparative Analysis. Int. Migr. Rev. 2000, 34 (4), 1245–1282.
14	-14	Todaro, M. P. Stephen C. Smith. Econ. Dev. 2006, 10.
15	-15	Lee, E. S. A Theory of Migration. Demography 1966. https://doi.org/10.2307/2060063.
16	-16	Harris, J. R.; Todaro, M. P. Migration, Unemployment and Development: A Two-Sector Analysis. Am. Econ. Rev. 1970.
17	-17	Ortega, F.; Peri, G. The Effect of Income and Immigration Policies on International Migration. Migr. Stud. 2013, 1 (1), 47–74. https://doi.org/10.1093/migration/mns004.
18	-18	Garcia, A. J.; Pindolia, D. K.; Lopiano, K. K.; Tatem, A. J. Modeling Internal Migration Flows in Sub-Saharan Africa Using Census Microdata. Migr. Stud. 2014, 3 (1), 89–110. https://doi.org/10.1093/migration/mnu036.
19	-19	Termote, M. The Explanatory Power of Migration Models. In The Explanatory Power of Models; Springer, 2002; pp 165–179.
20	-20	Mavroudi, E.; Nagel, C. Global Migration: Patterns, Processes, and Politics; Routledge, 2016.
21	-21	Morawska, E. International Migration: Its Various Mechanisms and Different Theories That Try to Explain It. Willy Brand. Work. Pap. 2007.
22	-22	De Haas, H. Migration and Development: A Theoretical Perspective. Int. Migr. Rev. 2010. https://doi.org/10.1111/j.1747-7379.2009.00804.x.
23	-23	de Haas, H. The Internal Dynamics of Migration Processes: A Theoretical Inquiry. J. Ethn. Migr. Stud. 2010. https://doi.org/10.1080/1369183X.2010.489361.
24	-24	Carling, J.; Collins, F. Aspiration, Desire and Drivers of Migration. J. Ethn. Migr. Stud. 2018, 44 (6), 909–926. https://doi.org/10.1080/1369183X.2017.1384134.
25	-25	Gasper, D.; Gasper, D. The Ethics of Economic Development and Human Displacement. In The Oxford Handbook of Professional Economic Ethics; 2016. https://doi.org/10.1093/oxfordhb/9780199766635.013.023.
26	26	Bayar, M.; Aral, M. M. An Analysis of Large-Scale Forced Migration in Africa. Int. J. Environ. Res. Public Health 2019, 16 (21), 4210. https://doi.org/10.3390/ijerph16214210.
27	27	Visvizi, A.; Lytras, M. D.; Pachocka, M. Multiple Facets of Migration Research: Key Questions, Topics, and Avenues yet to Be Explored. Sustainability (Switzerland). MDPI AG January 1, 2020, p 225. https://doi.org/10.3390/SU12010225.
28	28	Van Hear, N.; Bakewell, O.; Long, K. Push-Pull plus: Reconsidering the Drivers of Migration. J. Ethn. Migr. Stud. 2018, 44 (6), 927–944. https://doi.org/10.1080/1369183X.2017.1384135.
29	-31	Process Tracing; Bennett, A., Checkel, J. T., Eds.; Cambridge University Press: Cambridge, 2014. https://doi.org/10.1017/CBO9781139858472.
30	-32	Bloemraad, I. The Promise and Pitfalls of Comparative Research Design in the Study of Migration. Migr. Stud. 2013, 1 (1), 27–46. https://doi.org/10.1093/migration/mns035.
31	-41	UNHCR. Global Trends Forced Displacements 2017 Trends at a Glance. 2017, 1–76.
32	-42	United Nations. International Migration 2019 Report; 2019. https://doi.org/10.18356/c36d3e0d-en.
33	-43	Internal Displacement Monitoring Centre. Global Report on Internal Displacement 2017; 2017.
34	-136	United Nations; Assembly, G. New York Declaration for Refugees and Migrants. Int. J. Refug. Law 2019, 30 (4), 715–743. https://doi.org/10.1093/ijrl/eez018.
35	-138	Skeldon, R. Interlinkages between Internal and International Migration and Development in the Asian Region. Popul. Space Place 2006, 12 (1), 15–30.
36	-139	Skeldon, R. On Migration and the Policy Process. In Migration, Development and Environment: Migration Processes from the Perspective of Environmental Change and Development Approach at the Beginning of the 21st Century; Cambridge Scholars Publishing in association with GSE Research, 2008; Vol. 154, pp 154–172.

## Sheet: Initial Selection
Afifi T., Liwenga E., & Kwezi L. (2014) Rainfall-induced crop failure, food insecurity and out-migration in Same-Kilimanjaro, Tanzania. Climate and Development,6:1, 53-60, DOI: 10.1080/17565529.2013.826128
Angenendt, S.; Martin-Shields, Charles; Schraven, Benjamin. More Development – More Migration? The “Migration Hump” and Its Significance for Development Policy Cooperation with Sub-Saharan Africa. DIE Briefing Paper, number 15/2017.
Babu, S.C. & Hassan, R., 1995. International migration and environmental degradation—The case of Mozambican refugees and forest resources in Malawi. Journal of Environmental Management, 43(3), pp.233–247. Available at: https://www.sciencedirect.com/science/article/pii/S030147979590414X [Accessed January 24, 2019].
Bakewell, O. (2008). Research Beyond the Categories: The Importance of Policy Irrelevant Research into Forced Migration. Journal of Refugee Studies, 21(4), 432–453. https://doi.org/10.1093/jrs/fen042
Ball, Jessica and Moselle, Sarah. (2016) “Forced Migrant Youth’s Identity Development and Agency in Resettlement Decision-Making: Liminal Life on the Myanmar-Thailand Border.” Migration, Mobility, & Displacement 2 (2): 110-125.
Bennett, A. & Checkel, J.T. eds., 2014. Process Tracing, Cambridge: Cambridge University Press. Available at: http://ebooks.cambridge.org/ref/id/CBO9781139858472 [Accessed January 23, 2019].
Bhavnani, R., & Lacina, B. (2015). The Effects of Weather-Induced Migration on Sons of the Soil Riots in India. World Politics, 67(4), 760-794. doi:10.1017/S0043887115000222
Bijak, J. (2006) “Forecasting international migration: selected theories, models and methods”, CEFMR Working Paper no. 4, Central European Forum for Migration Research,Warsaw.
Black, R., Adger, W. N., Arnell, N. W., Dercon S., Geddes, A. & Thomas, D. (2011). The effect of environmental change on human migration. Global Environmental Change, 21, S3-S11.
Blanchard O. J., Katz L. F. (1992). Regional Evolutions. Brookings Papers on Economic Activity 1992, 1: 1-75.
Bloemraad, I. (2013) ‘The promise and pitfalls of comparative research design in the study of migration’, Migration Studies, 1(1), pp. 27–46. doi: 10.1093/migration/mns035.
Brettel C. B., Hollifield J. F. (eds.) (2000). Migration Theory: Talking Across Disciplines. New York: Routledge.
Buhaug, H., 2015. Climate-conflict research: Some reflections on the way forward. Wiley Interdisciplinary Reviews: Climate Change, 6(3), pp.269–275.
Buhaug, H. et al., 2015. Climate variability, food production shocks, and violent conflict in Sub-Saharan Africa. Environmental Research Letters, 10(12), p.125015. Available at: http://stacks.iop.org/1748-9326/10/i=12/a=125015?key=crossref.ade0efecbc97984c7c525bc961f9e298 [Accessed January 23, 2019]
Callahan, M. P. (2004). Making enemies: war and state building in Burma (Singapure, NUS Press).
Carling, J., Collins, F. (2018). Aspiration, desire and drivers of migration, Journal of Ethnic and Migration Studies, 44:6, 909-926, DOI: 10.1080/1369183X.2017.1384134
Castles S., Miller M. (1993). The Age of Migration. London: McMillan.
Castles, S. (2010). Understanding Global Migration: a Social Transformation Perspective, Journal of Ethnic and Migration Studies.
Castles, S., Haas, H. de, & Miller, M. J. (2014). The age of migration: international population movements in the modern world (Fifth edition). New York: Guilford Press.
Castro-Nunez, A., Mertz, O. & Quintero, M., 2016. Propensity of farmers to conserve forest within REDD+ projects in areas affected by armed-conflict. Forest Policy and Economics, 66, pp.22–30. Available at: http://dx.doi.org/10.1016/j.forpol.2016.02.005.
Centro Nacional de Memoria Histórica. (2013). ¡Basta Ya! Colombia: Memorias de Guerra y Dignidad. Bogotá: Grupo de Memoria Histórica.
Clay, E. Overseas Development Institute, London, UK, for the FAO Expert Consultation on Trade and Food Security: Conceptualizing the Linkages, Rome, 11-12 July 2002.
Climate and Development Knowledge Network (2014a). The IPCC’s Fifth Assessment Report: What’s in it for South Asia? CDKN, London. Available from https://cdkn.org/wp-content/uploads/2014/04/CDKN-IPCC-Whats-in-it-for-South-Asia-AR5.pdf
Climate and Development Knowledge Network (2014b). The IPCC’s Fifth Assessment Report: What’s in it for Africa? CDKN, London. Available from https://cdkn.org/wp-content/uploads/2014/04/AR5_IPCC_Whats_in_it_for_Africa.pdf
Connell, J., 2015. Statelessness and environmental displacement Forced migration review , 2015, (49), p.46
Cornelius, W.A. & Rosenblum, M.R., 2005. IMMIGRATION AND POLITICS. Annual Review of Political Science, 8(1), pp.99–119. Available at: http://www.annualreviews.org/doi/10.1146/annurev.polisci.8.082103.104854 [Accessed January 27, 2019].
Crawley, H., Düvell, F., Jones, K., McMahon, S. and Sigona, N. (2016). ‘Destination Europe? Understanding the dynamics and drivers of Mediterranean migration in 2015’, MEDMIG Final Report. http://www.medmig.info/wp-content/uploads/2016/12/research-briefdestination-europe.pdf
Crush, J., 2013. Linking Food Security, Migration and Development. International Migration, 51(5), pp.61–75. Available at: http://doi.wiley.com/10.1111/imig.12097 [Accessed January 23, 2019].
D. Gasper (2015). The ethics of economic development and human displacement.
In G. DeMartino & D.N. McCloskey (Eds.), Oxford handbook on professional economic ethics (pp. 534-557). Oxford & New York: Oxford University Press
Davenport, Christina; Will Moore; and Steven Poe. (2003) "Sometimes You Just Have to Leave: Domestic Threats and Forced Migration, 1964-1989." International Interactions 29 (1): 27-55.
De Haas, Hein. (2008) “Migration and development. A theoretical perspective,” International Migration Institute Working Paper no.9. University of Oxford.
De Haas, H. (2010) Migration and Development: A Theoretical Perspective. International Migration Review, 44(1): 227–264.
Departamento Nacional de Planeación Colombia (DNP), (2016). Índice de incidencia del conflicto armado – Grupo de Proyectos Especiales Bogotá D.C., octubre de 2016.
Echandía, C. (1999) “Expansión territorial de las guerrillas colombianas: geografía, economía y violencia” in Deas, M. and Llorente, M. (eds.) Reconocer la guerra para construir la paz. CEREC, Ediciones Uniandes, Editorial Norma, Bogotá, 99–149.
European Comission. (2015). 1st meeting of the EUROPEAN MIGRATION FORUM Safe routes, safe futures. How to manage the mixed flows of migrants across the Mediterranean? European Migration Forum. Brussels.
Favell, Adrian, and Tim Elrick, eds. 2008. “The New Face of East-West Migration in Europe.” Special issue, Journal of Ethnic and Migration Studies 34(5): 699–841.
Food and Agriculture Organization of the United Nations (FAO) (2006): Policy Brief, Issue 2, http://www.fao.org/fileadmin/templates/faoitaly/documents/pdf/pdf_Food_Security_Cocept_Note.pdf [Accessed: 13.12.2018].
FAO (2016) Migration, Agriculture and Rural Development (2016). Global trends. Addressing the root causes of migration and harnessing its potential for development.
FAO, 2017. The relationships between food security and violent conflicts: The case of Colombia. Available at: http://www.fao.org/3/a-i8339e.pdf [Accessed January 27, 2019].
FAO & IOM, 2017. Agriculture and migration in the context of climate change, Available at: www.fao.org/climate-change [Accessed January 18, 2019].
FAO & IFPRI, 2017. Conflict, migration and food security: The role of agriculture and rural development, Available at: http://ebrary.ifpri.org/utils/getfile/collection/p15738coll2/id/131430/filename/131640.pdf [Accessed January 20, 2019].
FAO IFAD IOM WFP. 2018. The Linkages between Migration, Agriculture, Food Security and Rural Development. Rome. 80pp. (http://www.fao.org/3/CA0922EN/CA0922EN.pdf). Licence: CC BY-NC-SA 3.0 IGO
Garcia, A. J. et al. (2014) ‘Modeling internal migration flows in sub-Saharan Africa using census microdata’, Migration Studies, 3(1), pp. 89–110. doi: 10.1093/migration/mnu036.
Government of Colombia (2018) Intended Nationally Deterined COntributions (INDC) Avialable at: http://www.minambiente.gov.co/images/cambioclimatico/pdf/colombia_hacia_la_COP21/iNDC_ingles.pdf
Gemenne, F. (2011). Why the numbers don’t add up: A review of estimates and predictions of people displaced by environmental changes. Global Environmental Change, 21, S41– S49. https://doi.org/10.1016/j.gloenvcha.2011.09.005
Global Trends Forced Displacement. (2016) United Nations High Commissioner for Refugees.
Goodwin-Gill, Guy S.; McAdam, Jane. (2007) The Refugee in International Law, Oxford: Oxford University Press, 3rd ed.
Griffiths, Mike and Ito, Michiko. (2016) “Migration in Myanmar: Perspectives from current research”, Yangon Republic of the Union of Myanmar, Livelihoods and Food Security Trust Fund.
Grundy-Warr, Carl. (2013) "Myanmar/Burma, migration 1962 to present." The Encyclopedia of Global Human Migration, 2013.
Haaß, F., Kurtenbach, S. & Strasheim, J., 2016. Fleeing the Peace? Determinants of Outward Migration after Civil War, Available at: www.giga-hamburg.de [Accessed January 27, 2019].
Hall, Andy. (2012) Myanmar and migrant workers: briefing and recommendations, Mahidol Migration Center.
Hendrix C. and Salehyan, I. (2012) Climate change, rainfall triggers and social conflict in Africa J. Peace Res., 49 (1) (2012), pp. 35-50
Henry, S., Boyle, P., & Lambin, E. F. (2003). Modelling inter-provincial migration in Burkina Faso, West Africa: The role of socio-demographic and environmental factors. Applied Geography, 23, 115–136
Hickey, Maureen; Narendra, Pitra and Rainwater, Katie. (2013) A Review of Internal and Regional Migration Policy in Southeast Asia. A Review of Internal and Regional Migration Policy in Southeast Asia Migration out of Poverty (Research program consortium). Asia Research Institute. National University of Singapore.
Huang, H., von Lampe, M. & van Tongeren, F., 2011. Climate change and trade in agriculture. Food Policy, 36, pp.S9–S13. Available at: https://www.sciencedirect.com/science/article/pii/S0306919210001119 [Accessed January 16, 2019].
Heinrich Böll Stiftung (2015). “A Continent on the Move. Asian Migration”. Perspectives analyses and commentary. Issue 3.
ICBF (Instituto Colombiano de Bienestar Familiar) & WFP (World Food Programme). 2008. Mapas de la Situacion Nutricional en Colombia. Bogota.
Internal Displacement Centre IDCM, Norwegian Refugee Council (2015), Global Overview 2015: People Internally Displaced by Conflict and Violence, Geneva.
Internal Displacement Monitoring Center (IDMC) 2017 Global Report on Internal Displacement 2017. IDMC, Geneva. Available from www.internal-displacement. org/global-report/grid2017/pdfs/2017-GRID.pdf.
Internal Displacement Monitoring Center (IDMC) 2018 Global Report on Internal Displacement 2018. IDMC, Geneva. Available from www.internal-displacement. org/global-report/grid2017/pdfs/2017-GRID.pdf.
International Institute for Environmental Development (IIED). (2008). Climate change and drylands.
ILO (2015). “Internal Labor Migration in Myanmar: Building an evidence-base on patterns in migration, human trafficking and forced labor”. Yangon, ILO.
ILO (2015). Safe Migration Knowledge, Attitudes and Practices in Myanmar. Bangkok, ILO/MDRICESD.
INFORM Index for Risk Management Global Results Report 2017, www.inform-index.org/Portals/0/InfoRM/
INFORM%20Global%20Results%20Report%202017%20 FINAL%20WEB.pdf.
IMF/World Bank (2013). Global Monitoring Report 2013. Washington, D.C.
Intergovernmental Panel on Climate Change. (2013). Climate Change 2013:The Physical Science Basis. Available online: https://www.ipcc.ch/report/ar5/wg1/
International Organization for Migration (IOM) (2015). Myanmar: Overview. Yangon, Myanmar, IOM.
IOM (2009) Nargis Response: IOM Response to Cyclone Nargis Emergency: One Year On. Available from http://yangon.sites.unicnetwork.org/files/2013/05/IOM_Nargis_Newsletter_-_May_2009.pdf
IOM (International Organization for Migration) and ARCM (Asian Research Centre for Migration) (2013), Assessing Potential Changes in the Migration Patterns of Myanmar Migrants and Their Impacts on Thailand. Bangkok: International Organization for Migration.
IOM and ARCM (2013). Assessing Potential Changes in the Migration Patterns of Myanmar Migrants and their Impacts on Thailand, IOM.
IOM (2016) “Migrants from Myanmar and risks faced abroad - a desk study 2016”. (2016) Geneva, Switzerland, International Organization for Migration.
IOM (2016). Assessing the Climate Change Environmental Degradation and Migration Nexus in South Asia. IOM, Bangladesh. Available from https://publications.iom.int/system/files/pdf/environmental_ degradation_nexus_in_south_asia.pdf.
IOM (2018) World Migration Report 2018. Switzerland.
Ionesco, D., Mokhnacheva, D., & Gemenne, F. (2017). Atlas der Umweltmigration. (B. Steckhan, S. Schuhmacher, & G. Gockel, Trans.) (Lizenzausgabe für die Bundeszentrale für Politische Bildung). Bonn: bpb, Bundeszentrale für Politische Bildung.
K. von Grebmer, J. Bernstein, A. de Waal, N. Prasai, S. Yin, and Y. Yohannes. (2015) Global Hunger Index: Armed Conflict and the Challenge of Hunger. Bonn, Washington, DC, and Dublin: Welthungerhilfe, International Food Policy Research Institute, and Concern Worldwide.
Kniveton, Dominic; Schmidt-Verkerk, Kerstin; Smith, Christopher and Black, Richard (2008) Climate Change and Migration: Improving Methodologies to Estimate Flows. IOM Migration Research Series 33. Geneva: International Organization for Migration.
Knobloch, L. (2018). On the move in a changing climate – Challenges in researching the migration- environment nexus. Term Paper. Winter Semester 2017/2018. Environmental Sociology and Environmental Policy. Humboldt-Universität zu Berlin.
Kurekova, L. (2011). Theories of Migration: Conceptual review and empirical testing in the context of the EU East-West Flows. Conference Paper of the Interdisciplinary Conference on Migration, Economic Change, Social Challenge at the University College London. Online access via https://cream.conference-services.net/resources/952/2371/pdf/MECSC2011_0139_paper.pdf (last accessed on May 5, 2016).
Kusakabe, Kyoko and Pearson, Ruth. (2010) “Transborder Migration, Social Reproduction and Economic Development: a Case Study of Burmese Women Workers on Thailand”, International Migration Journal, 48 (6): 13-43.
Kusakabe, Kyoko and Mar Oo, Zin. (2007) “Relational Places of Ethnic Burman Women Migrants in the Borderland Town of Tachileik, Myanmar”, Singapore Journal of Tropical Geography 28: 3, 300-13.
Leal Buitrago, F., 2011. Una visión de la seguridad en Colombia, Instituto de Estudios Políticos y Relaciones Internacionales (IEPRI), Universidad Nacional de Colombia. Available at: http://www.revistas.unal.edu.co/index.php/anpol/article/view/43704/44974 [Accessed January 27, 2019].
Liwenga E.T., Kwezi L., & Afifi T. (2012). ‘‘When the rain falls’’ project. Case study: Tanzania. Results from Same District, Kilimanjaro Region. Report. No. 6. Bonn. United Nation University. Institute for Environmental and Human Security (UNU-EHS).
Massey D., Arango J., Hugo G., Kouaouci A., Pellegrino A., Taylor J. E. (1993). Theories of International Migration: A Review and Appraisal. Population and Development Review 19, 3: 431-466.
Massey D., Arango J., Hugo G., Kouaouci A., Pellegrino A., Taylor J. E. (1998). Worlds in Motion: Understanding International Migration at the End of the Millennium. Oxford: Clarendon Press.
Maxwell, S. 1996. Food security: a post-modern perspective. Food Policy. 21 (2): 155-170.
McLeman, R., & Smit, B. (2006). Migration as an adaptation to climate change. Climatic Change, 76(1–2), 31–53. doi: 10.1007/00584-005-900.
McLeman, R., Schade, J., & Faist, T. (Eds.). (2016). Environmental migration and social inequality. Cham Heidelberg New York Dordrecht London: Springer.
Melander, E. (2015). Organized Violence in the World 2015. Retrieved from http://www.pcr.uu.se/ digitalAssets/61/61335_3brochure2.pdf
Meyers, Eytan (2000) “Theories of international immigration policy- a comparative analysis”, International Migration Review, 34(4): 1245-1282.
Mercandalli, S. & Losch, B., eds. 2017. Rural Africa in motion. Dynamics and drivers of migration South of the Sahara. Rome, FAO and CIRAD. 60 p.
Miller, Mark J.; Castles, Stephen. (2003) The Age of Migration. International Population Movements in the Modern World, 4. Auflage. Palgrave, London.
Moore, Will H.; Shellman, Stephen M. (2004) “Fear of persecution, 1925-1995”. Journal of Conflict Resolution 40 (5): 723-745.
Morales, H. 2017. The Role of Sustainable Energy Access in the Migration Debate. European Union Energy Initiative Partnership Dialogue Facility (EUEI PDF). Eschborn.
Neumann, K. et al., 2015. Environmental drivers of human migration in drylands – A spatial picture. Applied Geography, 56, pp.116–126. Available at: https://www.sciencedirect.com/science/article/pii/S0143622814002768 [Accessed January 17, 2019].
Ng’ang’a, S.K. et al., 2016. Migration and Self-Protection Against Climate Change: A Case Study of Samburu County, Kenya. World Development, 84, pp.55–68. Available at: https://www.sciencedirect.com/science/article/pii/S0305750X16303527 [Accessed January 17, 2019].
Nielsen, J.Ø. Reenberg A. 2010. Temporality and the problem with singling out climate as a current driver of change in a small West African village. Journal of Arid Environments, 74 (4) , pp. 464-474
Notre Dame Global Adaptation Index.Availablee from gain.nd.edu.
Obokata, R., Veronis, L., & McLeman, R. (2014). Empirical research on international environmental migration: a systematic review. Population and Environment, 36(1), 111–135. https://doi.org/10.1007/s11111-014-0210-7
Ocello, C. et al., 2015. Environmental aspects of internal migration in Tanzania. Population and Environment, 37, pp.99–108. Available at: www.worldbank.org/lsms. [Accessed January 24, 2019].
Ombudsman Office of Colombia (Defensoría del Pueblo Colombia). 2019. http://www.defensoria.gov.co/
Ortega, F. and Peri, G. (2013) ‘The effect of income and immigration policies on international migration’, Migration Studies, 1(1), pp. 47–74. doi: 10.1093/migration/mns004.
Parmar, P. K. et al. (2019) ‘Migration patterns & their associations with health and human rights in eastern Myanmar after political transition: results of a population-based survey using multi staged household cluster sampling’, Conflict and Health, 13(1), p. 15. doi: 10.1186/s13031-019-0193-1.
Paavola, J., 2008. Livelihoods, vulnerability and adaptation to climate change in Morogoro, Tanzania. Environmental Science & Policy, 11(7), pp.642–654. Available at: https://www.sciencedirect.com/science/article/pii/S1462901108000695 [Accessed January 24, 2019].
Paul, B. K. (2005). Evidence against disaster-induced migration: The 2004 tornado in north-central Bangladesh. Disasters, 29(4), 370–385.
Pettersson, T., & Wallensteen, P. (2015). Armed conflicts, 1946-2014. Journal of Peace Research, 52(4), 536–550. http://doi. org/10.1177/0022343315595927
Philippine Institute for Development Studies (PIDS). (2012) Enhancing the Protection and Promotion of Migrant Workers’ Rights in ASEAN. PIDS Policy Brief 5.
Portes, A., & DeWind, J. (Eds.). (2007). Rethinking migration: new theoretical and empirical perspectives. New York: Berghahn Books.
Radel, C. et al., 2018. Toward a Political Ecology of Migration: Land, Labor Migration, and Climate Change in Northwestern Nicaragua. World Development, 108, pp.263–273. Available at: https://www.sciencedirect.com/science/article/pii/S0305750X17301341 [Accessed January 17, 2019].
Raleigh, C., Jordan, L., & Salehyan, I. (2008). Assessing the impact of climate change on migration and conflict. Washington, DC: World Bank Group. http://siteresources.worldbank.org/EXTSOCIAL DEVELOPMENT/Resources/SDCCWorkingPaper_MigrationandConflict.pdf
Raleigh, C. 2011. "The Search for Safety: The Effects of Conflict, Poverty and Ecological Influences on Migration in the Developing World." Global EnvironmentalChange-Humann and Policy Dimensions 21: S82–S93.
Raleigh, C., Choi, H.J. & Kniveton, D., 2015. The devil is in the details: An investigation of the relationships between conflict, food price and climate across Africa. Global Environmental Change, 32, pp.187–199. Available at: https://www.sciencedirect.com/science/article/pii/S0959378015000357#! [Accessed January 16, 2019].
Reeder G. (2019) Urban Governance of Flooding in Myanmar: A Case Study of Bago. In: Daniere A., Garschagen M. (eds) Urban Climate Resilience in Southeast Asia. The Urban Book Series. Springer, Cham
Refugees International, Accelerating Threats from Climate Change: Disasters and Displacement in Myanmar, 5 December 2016, available at: http://www.refworld.org/docid/5846c7b94.html [accessed 10 June 2017].
Renaud, Fabrice; Bogardi, Janos J.; Dun, Olivia and Warner, Koko (2007). “Control, adapt or flee: how to face environmental migration”, InterSections, 5. Bonn, UNU-EHS.
Reuter, J. (Ed.). (2015). Schlüsselwerke der Migrationsforschung: Pionierstudien und Referenztheorien. Wiesbaden: Springer VS.
Rigaud, K.K., de Sherbinin, A., Jones, B., Bergmann, J., Clement, V., Ober, K., Schewe, J., Adamo, S., McCusker, B., Heuser, S., & Midgley, A. 2018. Groundswell: Preparing for Internal Climate Migration. Washington, DC, The World Bank.
Rowhani, P. et al., 2011. Malnutrition and conflict in East Africa: the impacts of resource variability on human security. Climatic Change, 105(1–2), pp.207–222. Available at: http://link.springer.com/10.1007/s10584-010-9884-8 [Accessed January 16, 2019].
Rowhani P, Lobell D B, Linderman M and Ramankutty N 2011 Climate variability and crop production in Tanzania Agric. For. Meteorol. 151 449–60
Rudloff, Bettina. (2o12) Engel, Arno; Oberländer, Lisa. Contingency planning for food crisis. A puzzle of existing approaches. Working Paper FG 2, 2012/ Nr. 03.
Salehyan, Idean. (2008) “From climate change to conflict? No consensus yet,” Journal of Peace Research, 45(3): 315-326.
Skeldon, Ronald, Interlinkages between Internal and International Migration in the Asian Region (October 26, 2004). Population, Space and Place, 2005. Available at SSRN: https://ssrn.com/abstract=1831128
Skeldon, Ronald (2008) Migration and Development. United Nations Expert Group Meeting on International Migration and Development in Asia and the Pacific. United Nations Economic and Social Commission for Asia and the Pacific, Population Division, Department of Economic and Social Affairs, 20-21 September 2008, Bangkok.
Sijapati, Bandita. (2015) Women’s Labor Migration from Asia and the Pacific: Opportunities and Challenges. IOM-MPI Issue in Brief no. 12. Bangkok and Washington, D.C. Available from https://publications.iom.int/system/files/pdf/mpi_issue12.pdf
Solomon et al. 2007 Technical Summary, in Climate Change 2007: The Physical Science Basis, in S., D. Qin, M. Manning, Z. Chen, M. Marquis, K.B. Averyt, M. Tignor and H.L. Miller (eds), Contribution of Working Group I to the Fourth Assessment Report of the Intergovernmental Panel on Climate Change Solomon, Cambridge University Press, Cambridge, United Kingdom and New York, NY, USA.
South, Ashley and Joliffe, Kim. Forced Migration: Typology and Local Agency in Southeast Myanmar (Contemporary Southeast Asia Vol.37, No.2 (2015), p.225.
Sudarkasa, Niara (1977) Women in migration in contemporary West Africa. Signs: Journal of Women in Culture and Society 3 (1), 178–9.
Tapinos, G. P. 1990. Development Assistance Strategies and Emigration Pressure in Europe and Africa. Washington, DC: Commission for the Study of International Migration and Co-operative Economic Development.
Tacoli, C. (2009). Crisis or adaptation? Migration and climate change in a context of high mobility. Environment and Urbanization, 21(2), 513–525.
	https://doi.org/10.1177/0956247809342182
The Republic of the Union of Myanmar. (2014) The 2014 Myanmar Population and Housing Census. The Union Report. Census Report Volume 2. Department of Population, Ministry of Immigration and Population, Nay Pyi Taw, Myanmar.
Theisen, O.M. (2012). Climate clashes? Weather variability, land pressure, and organized violence in Kenya 1989–2004. J. Peace Res., 49 (1) (2012), pp. 81-96
Theisen, O.M., 2017. Climate Change and Violence: Insights from Political Science. Current Climate Change Reports, 3(4), pp.210–221.
Tierney, J., C. Ummenhofer and P. deMenocal 2015 Past and future rainfall in the Horn of Africa. Science Advances, 1(9):1–8. Available from http:// advances.sciencemag.org/content/1/9/e1500682.
Todaro, Michael P. and Steven Smith. 2006. Economic Development. Boston: Addison Wesley. Todaro, Michael P. 1969. “A model of labor migration and urban unemployment in less-developed countries,” American Economic Review 59:138-148.
Transnational Institute. (2017). Re-Asserting Control: Voluntary Return, Restitution and the Right to Land for IDPs and Refugees in Myanmar. MYANMAR POLICY BRIEFING | 20 | May 2017. Avialable: https://www.tni.org/files/publication-downloads/voluntary_return_restitution_and_the_right_to_land_for_idps_and_refugees_in_myanmar.pdf (accessed 20.02.2019).
Trentmann, C. 2003. Sistema de Identificación y Monitoreo de la Vulnerabilidad Alimentaria (SIMVA). Informe final de consultoría al PMA. Bogotá, Colombia.
Uluguru Mountains Biodiversity Conservation Project (2004) Available online: http://www.easternarc.or.tz/groups/webcontent/documents/pdf/WorldBirdwatch%20conserving%20biodiversity%20in%20the%20Ulugurus%202001.pdf Recovered 24.01.2019
United Nations, Department of Economic and Social Affairs, Population Division (2016). International Migration Report 2015: Highlights (ST/ESA/SER.A/375).
UN Refugee Agency (UNHCR) (2019) Global Trends - Forced Displacement in 2018, UNHCR Global Trends 2018. Available at: http://ezproxy.leedsbeckett.ac.uk/login?url=http://search.ebscohost.com/login.aspx?direct=true&db=edb&AN=3440211&site=eds-live&scope=site (Accessed: 2 June 2020).
United Nations (2019) International Migration 2019 Report, International Migration 2019 Wall Chart. doi: 10.18356/c36d3e0d-en
United Nations High Commissioner for Refugees (UNHCR) (2013) Myanmar Situation External Update #4, August–September 2013.
United Nations Development Programme (UNDP) 2009 Overcoming Barriers: Human Mobility and Development. Human Development Report. UNDP, New York.
United Nations High Commissioner for Refugees (UNHCR) (2017) Forced Displacement in 2017 Global Trends http://www.unhcr.org/dach/wp-content/uploads/sites/27/2018/06/GlobalTrends2017.pdf (accessed 24.10.2018)
United Nations High Commissioner for Refugees (UNHCR), (2018). UNHCR Submission on Yemen: 32nd UPR session , December 2018, available at: https://www.refworld.org/docid/5c52c7387.html [accessed 24 April 2019]
United Nations Office for the Coordination of Humanitarian Affairs (UNOCHA) (2016) El Niño in Southern Africa. OCHA. Available from www.unocha.org/legacy/el-nino-southern-africa.
United Nations Office for the Coordination of Humanitarian Affairs (UNOCHA) (2016) El Niño in East Africa. OCHA. Available from www.unocha.org/legacy/el-nino-east-africa.
United Nations. General Assembly. (2016) New York Declaration for Refugees and Migrants https://www.iom.int/sites/default/files/our_work/ODG/GCM/NY_Declaration.pdf
UNU-WIDER. (2016). How should the international community respond to migration and refugees? Blog. Retrieved November 11, 2016, from https://www. wider.unu.edu/publication/how-should-internationalcommunity-respond-migration-and-refugees
United States Agency for International Development (USAID) (2010) “Country profile.” Property rights and resource Governance.
Valenzuela, P. & Caicedo, S. (2018) Environmental Peacebuilding in Post-conflict Colombia. In: Swain, A. (Ed.), Öjendal, J. (Ed.). (2018). Routledge Handbook of Environmental Conflict and Peacebuilding. London: Routledge, https://doi.org/10.4324/9781315473772 pp. 245-253.
Van Hear, N. Bakewell, O. & Long K. (2018) Push-pull plus: reconsidering the drivers of migration, Journal of Ethnic and Migration Studies, 44:6, 927-944, DOI: 10.1080/1369183X.2017.1384135
Vargas‐Lundius, R., G. Lanly, M. Villarreal, and M. Osorio 2008 International Migration, Remittances and Rural Development, FAO and IFAD, Rome.
Zezza, A., C. Carletto, B. Davis, and P. Winters 2011 “Assessing the impact of migration
Vargas-Silva, C. (Ed.). (2012). Handbook of research methods in migration. Cheltenham, UK ; Northampton, MA: Edward Elgar.
Warner, K.; Hamza, M.; Oliver-Smith, A.; Renaud, F. & Julca, A. (2010a). Climate change, environmental degradation and migration. Natural Hazards, 55(3), 689-715.
Warner, K. & Afifi, T., 2014. Where the rain falls: Evidence from 8 countries on how vulnerable households use migration to manage the risk of rainfall variability and food insecurity. Climate and Development, 6(1), pp.1–17. Available at: http://www.tandfonline.com/doi/abs/10.1080/17565529.2013.835707 [Accessed January 24, 2019].
Witsenburg, K. and Adano, W.R. (2007). The use and management of water sources in Kenya's drylands: is there a link between scarcity and violent conflict? B. Derman, R. Odgaard, E. Sjaastad (Eds.), Conflicts Over Land and Water in Africa, James Currey, Oxford (2007), pp. 215-238
White, Michael J. (ed.) (2016) International Handbook of Migration and Population Distribution New York: Springer. 636 p.
Wood, William B. (2001). "Ecomigration: Linkages between Environmental Change and Migration". In Global Migrants, Global Refugees. Eds. A. R. Zolberg and P. M. Benda. New York and Oxford: Berghahn: 42-61.
World bank (2016). “Migration and Remittances Data: Annual Remittances Data, Outflows.
World Bank. (2016). A Country on the Move: Domestic Migration in Two Regions of Myanmar. http://www.lift-fund.org/country-move-qualitative-social-and-economic-monitoring-qsem-thematic-studydomestic-migration-two
World Bank (2015). Myanmar: Empowering People for Inclusive Growth; Myanmar Country Partnership Framework for the Period 2015-2017.
World Food Programme WFP. (2003) Vulnerabilidad a la inseguridad alimentaria de la población desplazada por la violencia en Colombia. Bogota.
World Food Programme, 2015. Hunger Without Borders 3, Available at: https://documents.wfp.org/stellent/groups/public/documents/liaison_offices/wfp277544.pdf [Accessed January 18, 2019].
World Food Programme, 2017. At the root of exodus: Food security, conflict and international migration. , (May). Available at: https://docs.wfp.org/api/documents/WFP-0000015358/download/?_ga=2.134185742.146609166.1509628590-1464773621.1507826083.
